# Supplementary material
Source: PubMed Central journal article supplement (PMC6460763)
Supplement: 41437_2018_133_MOESM1_ESM.pdf [file 41437_2018_133_MOESM1_ESM.pdf]

**Figure S1** Locations of *Drosophila* universal primers, *RpL40*.

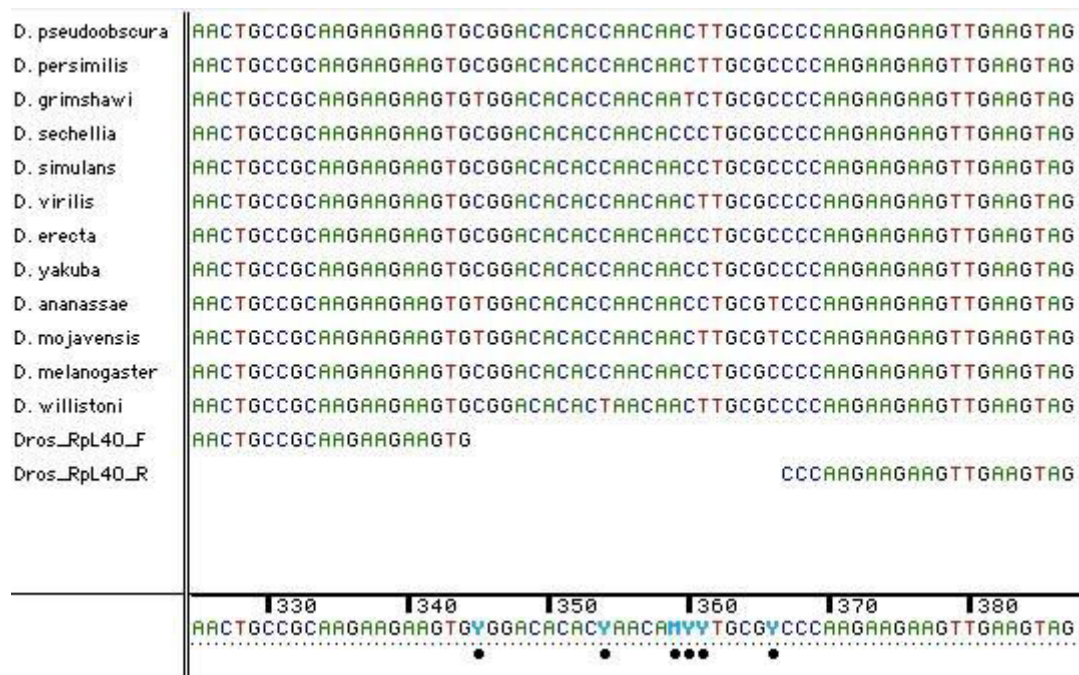

**Table S1** Summary of sequences included in *Wolbachia* species tree analysis (Fig 1). ‘Reference’ refers to the publication describing the sequences used, ‘*Wolbachia* strain name’ is listed only if referred to in the reference publication and ‘isolate number’ refers to the identity of the sequence in the *Wolbachia* MLST database at <http://pubmlst.org/wolbachia/> (Jolley and Maiden, 2010). Where sequences were obtained from whole genome sequences, the region used has been listed next to the ‘Genbank accession’.

| Host species name            | <i>Wolbachia</i> strain |                             | Isolate   |                          |
|------------------------------|-------------------------|-----------------------------|-----------|--------------------------|
|                              | name                    | Reference                   | number    | Genbank accession        |
| <i>Drosophila bifasciata</i> | N/A                     | (Baldo <i>et al</i> , 2006) | isolate 5 | <i>coxA</i> - DQ842279.1 |
|                              | "                       | "                           | "         | <i>gatB</i> - DQ842427.1 |
|                              | "                       | "                           | "         | <i>hcpA</i> - DQ842390.1 |
|                              | "                       | "                           | "         | <i>fpbA</i> - DQ842353.1 |
|                              | "                       | "                           | "         | <i>ftsZ</i> - DQ842315.1 |
|                              | "                       | "                           | "         | <i>wsp</i> - DQ842463.1  |
| <i>D. innubila</i>           | N/A                     | (Baldo <i>et al</i> , 2006) | isolate 6 | <i>coxA</i> - DQ842280.1 |
|                              | "                       | "                           | "         | <i>gatB</i> - DQ842428.1 |
|                              | "                       | "                           | "         | <i>hcpA</i> - DQ842391.1 |

|                        |      |                                  |     |                                         |
|------------------------|------|----------------------------------|-----|-----------------------------------------|
|                        | "    | "                                | "   | <i>fpbA</i> - DQ842354.1                |
|                        | "    | "                                | "   | <i>ftsZ</i> - DQ842316.1                |
|                        | "    | "                                | "   | <i>wsp</i> - DQ842464.1                 |
| <i>D. melanogaster</i> | wMel | (Wu <i>et al</i> , 2004)         | N/A | <i>coxA</i> - AE017196.1; 280987-281432 |
|                        | "    | "                                | "   | <i>gatB</i> - AE017196.1; 131993-132423 |
|                        | "    | "                                | "   | <i>hcpA</i> - AE017196.1; 466250-465885 |
|                        | "    | "                                | "   | <i>fpbA</i> - AE017196.1; 1185651-      |
|                        | "    | "                                | "   | 1186117                                 |
|                        | "    | "                                | "   | <i>ftsZ</i> - AE017196.1; 699096-699564 |
|                        | "    | "                                | "   | <i>wsp</i> - AE017196.1; 1023310 -      |
|                        | "    | "                                | "   | 1023601                                 |
| <i>D. pandora</i>      | MK   | (Richardson <i>et al</i> , 2016) | N/A | <i>coxA</i> – KU686370.1                |
|                        | "    | "                                | "   | <i>gatB</i> – KU686373.1                |
|                        | "    | "                                | "   | <i>hcpA</i> – KU686374.1                |

|                    |     |                                  |            |                          |
|--------------------|-----|----------------------------------|------------|--------------------------|
|                    | "   | "                                | "          | <i>fpbA</i> – KU686371.1 |
|                    | "   | "                                | "          | <i>ftsZ</i> – KU686372.1 |
|                    | "   | "                                | "          | <i>wsp</i> – KU686375.1  |
| <i>D. pandora</i>  | wRi | (Richardson <i>et al</i> , 2016) | N/A        | <i>coxA</i> – KU686364.1 |
|                    | "   | "                                | "          | <i>gatB</i> – KU686367.1 |
|                    | "   | "                                | "          | <i>hcpA</i> – KU686368.1 |
|                    | "   | "                                | "          | <i>fpbA</i> – KU686365.1 |
|                    | "   | "                                | "          | <i>ftsZ</i> – KU686366.1 |
|                    | "   | "                                | "          | <i>wsp</i> – KU686369.1  |
| <i>D. simulans</i> | wRi | (Baldo <i>et al</i> , 2006)      | isolate 11 | <i>coxA</i> - DQ842285.1 |
|                    | "   | "                                | "          | <i>gatB</i> - DQ842433.1 |
|                    | "   | "                                | "          | <i>hcpA</i> - DQ842396.1 |
|                    | "   | "                                | "          | <i>fpbA</i> - DQ842359.1 |
|                    | "   | "                                | "          | <i>ftsZ</i> - DQ842323.1 |

|                            |     |                                 |            |                          |
|----------------------------|-----|---------------------------------|------------|--------------------------|
|                            | "   | "                               | "          | <i>wsp</i> - DQ842468.1  |
| <i>D. simulans</i>         | wAu | (Kriesner <i>et al</i> , 2013)  | isolate 10 | <i>coxA</i> - KF278668.1 |
|                            | "   | "                               | "          | <i>gatB</i> - KF278671.1 |
|                            | "   | "                               | "          | <i>hcpA</i> - KF278672.1 |
|                            | "   | "                               | "          | <i>fpbA</i> - KF278669.1 |
|                            | "   | "                               | "          | <i>ftsZ</i> - KF278670.1 |
|                            |     | Paraskevopoulos <i>et al</i> ., |            |                          |
|                            | "   | unpublished                     |            | <i>wsp</i> - DQ235409.1  |
| <i>Nasonia longicornus</i> | 2.1 | (Baldo <i>et al</i> , 2006)     | isolate 16 | <i>coxA</i> - DQ842295.1 |
|                            | "   | "                               | "          | <i>gatB</i> - DQ842443.1 |
|                            | "   | "                               | "          | <i>hcpA</i> - DQ842406.1 |
|                            | "   | "                               | "          | <i>fpbA</i> - DQ842369.1 |
|                            | "   | "                               | "          | <i>ftsZ</i> - DQ842331.1 |
|                            | "   | "                               | "          | <i>wsp</i> - DQ842478.1  |

*Culex quinquefasciatus*

|            |      |                               |     |                                                |
|------------|------|-------------------------------|-----|------------------------------------------------|
| <i>Pel</i> | wPip | (Klasson <i>et al</i> , 2008) | N/A | <i>coxA</i> - AM999887.1; 79211-78766          |
|            | "    | "                             | "   | <i>gatB</i> - AM999887.1; 84844-85266          |
|            | "    | "                             | "   | <i>hcpA</i> - AM999887.1; 1287994 -<br>1288353 |
|            | "    | "                             | "   | <i>fpbA</i> - AM999887.1; 1152376-<br>1152835  |
|            | "    | "                             | "   | <i>ftsZ</i> - AM999887.1; 624131-624599        |
|            | "    | "                             | "   | <i>wsp</i> - AM999887.1; 1006350-<br>1006062   |

*Rhagoletis cerasi*

|       |                                |            |                          |
|-------|--------------------------------|------------|--------------------------|
| wCer5 | (Arthofer <i>et al</i> , 2011) | isolate 70 | <i>coxA</i> - KJ546843.1 |
| "     | "                              | "          | <i>gatB</i> - KJ546847.1 |
| "     | "                              | "          | <i>hcpA</i> - KJ546855.1 |
| "     | "                              | "          | <i>fpbA</i> - KJ546851.1 |
| "     | "                              | "          | <i>ftsZ</i> - KJ546858.1 |

|                            |     |                             |            |                          |
|----------------------------|-----|-----------------------------|------------|--------------------------|
|                            | "   | "                           |            | <i>wsp</i> - EU344971.1  |
| <i>Acraea encedon</i>      | N/A | (Baldo <i>et al</i> , 2006) | isolate 22 | <i>coxA</i> - DQ842269.1 |
|                            | "   | "                           | "          | <i>gatB</i> - DQ842417.1 |
|                            | "   | "                           | "          | <i>hcpA</i> - DQ842380.1 |
|                            | "   | "                           | "          | <i>fpbA</i> - DQ842343.1 |
|                            | "   | "                           | "          | <i>ftsZ</i> - DQ842306.1 |
|                            | "   | "                           | "          | <i>wsp</i> - DQ842454.1  |
| <i>Ostrinia scapularis</i> | N/A | (Baldo <i>et al</i> , 2006) | isolate 32 | <i>coxA</i> - DQ842298.1 |
|                            | "   | "                           | "          | <i>gatB</i> - DQ842446.1 |
|                            | "   | "                           | "          | <i>hcpA</i> - DQ842409.1 |
|                            | "   | "                           | "          | <i>fpbA</i> - DQ842372.1 |
|                            | "   | "                           | "          | <i>ftsZ</i> - DQ842334.1 |
|                            | "   | "                           | "          | <i>wsp</i> - DQ842481.1  |
| <i>Brugia malayi</i>       | N/A | (Baldo <i>et al</i> , 2006) | isolate 37 | <i>coxA</i> - DQ842273.1 |

|                           |     |                                   |            |                                          |
|---------------------------|-----|-----------------------------------|------------|------------------------------------------|
|                           | "   | "                                 | "          | <i>gatB</i> - DQ842421.1                 |
|                           | "   | "                                 | "          | <i>hcpA</i> - DQ842384.1                 |
|                           | "   | "                                 | "          | <i>fpbA</i> - DQ842347.1                 |
|                           | "   | "                                 | "          | <i>ftsZ</i> - DQ842341.1                 |
|                           | "   | Garlipp and Isseroff, unpublished | "          | <i>wsp</i> - AY527201.1                  |
| <i>Onchocerca ochengi</i> | wOo | (Darby <i>et al</i> , 2012)       | N/A        | <i>coxA</i> - HE660029.1; 505781-506225  |
|                           | "   | "                                 | "          | <i>gatB</i> - HE660029.1; 814921-814507  |
|                           | "   | "                                 | "          | <i>hcpA</i> - HE660029.1; 605568-605203  |
|                           | "   | "                                 | "          | <i>fpbA</i> - HE660029.1; 437142-436676  |
|                           | "   | "                                 | "          | <i>ftsZ</i> - HE660029.1; 473656-474124  |
|                           | "   | "                                 | "          | <i>wsp</i> - HE660029.1; 675278 - 674989 |
| <i>Cimex lectularis</i>   | N/A | (Baldo <i>et al</i> , 2006)       | isolate 36 | <i>coxA</i> - DQ842275.1                 |
|                           | "   | "                                 | "          | <i>gatB</i> - DQ842423.1                 |
|                           | "   | "                                 | "          | <i>hcpA</i> - DQ842386.1                 |
|                           | "   | "                                 | "          | <i>fpbA</i> - DQ842349.1                 |



|                         |     |                                   |     |                          |
|-------------------------|-----|-----------------------------------|-----|--------------------------|
|                         | "   | "                                 | "   | <i>ftsZ</i> - DQ842311.1 |
|                         | "   | "                                 | "   | <i>wsp</i> - DQ842459.1  |
| <i>Folsomia candida</i> | N/A | (Bordenstein <i>et al</i> , 2009) | N/A | <i>coxA</i> - FJ390247.1 |
|                         | "   | Baldo and Werren, unpublished     | "   | <i>gatB</i> - N/A        |
|                         | "   | Baldo and Werren, unpublished     | "   | <i>hcpA</i> - N/A        |
|                         | "   | Baldo and Werren, unpublished     | "   | <i>fpbA</i> - N/A        |
|                         | "   | Baldo and Werren, unpublished     | "   | <i>ftsZ</i> - N/A        |
|                         | "   | Li, unpublished                   | "   | <i>wsp</i> - KP746935.1  |

---

## References

Arthofer W, Riegler M, Schuler H, Schneider D, Moder K, Miller WJ *et al* (2011). Allele intersection analysis: a novel tool for multi locus sequence assignment in multiply infected hosts. *PLoS ONE* **6**(7): E22198.

Baldo L, Hotopp JCD, Jolley KA, Bordenstein SR, Biber SA, Choudhury RR *et al* (2006). Multilocus sequence typing system for the endosymbiont *Wolbachia pipientis*. *Appl Environ Microbiol* **72**(11): 7098–7110.

Bordenstein SR, Paraskevopoulos C, Hotopp JC, Sapountzis P, Lo N, Bandi C *et al* (2009). Parasitism and mutualism in *Wolbachia*: what the phylogenomic trees can and cannot say. *Mol Biol Evol* **26**: 231-241.

Darby AC, Armstrong SD, Bah GS, Kaur G, Hughes MA, Kay SM *et al* (2012). Analysis of gene expression from the *Wolbachia* genome of a filarial nematode supports both metabolic and defensive roles within the symbiosis. *Genome Res* **22**: 2467-2477.

Jolley KA, Maiden MCJ (2010). BIGSdb: Scalable analysis of bacterial genome variation at the population level. *BMC Bioinformatics* **11**: 595.

Klasson L, Walker T, Sebahia M, Sanders MJ, Quail MA, Lord A *et al* (2008). Genome evolution of *Wolbachia* strain wPip from the *Culex pipiens* group. *Mol Biol Evol* **25**: 1877-1887.

Kriesner P, Hoffmann AA, Lee SF, Turelli M, Weeks AR (2013). Rapid sequential spread of two *Wolbachia* variants in *Drosophila simulans*. *PLoS Pathog* **9**(9): e1003607.

Richardson KM, Schiffer M, Griffin PC, Lee SF, Hoffmann AA (2016). Tropical *Drosophila pandora* carry *Wolbachia* infections causing cytoplasmic incompatibility or male killing. *Evolution* **70**(8): 1791-1802.

Wu M, Sun LV, Vamathevan J, Riegler M, Deboy R, Brownlie JC *et al* (2004). Phylogenomics of the reproductive parasite *Wolbachia pipientis* wMel: a streamlined genome overrun by mobile genetic elements. *PLoS Biology* **2**: E69.

**Table S2** Prior settings used in the \*BEAST species tree analysis.

| Gene                              | Partition prior settings                                                   | <i>coxA</i>       | <i>fpbA</i> | <i>ftsZ</i>                                                        | <i>gatB</i> | <i>hcpA</i> | <i>wsp</i>        |
|-----------------------------------|----------------------------------------------------------------------------|-------------------|-------------|--------------------------------------------------------------------|-------------|-------------|-------------------|
| <b>Best partitioning scheme</b>   |                                                                            | 1+2+3             | 12+3        | 1+2+3                                                              | 12+3        | 12+3        | 1+2+3             |
| <b>Codon position 1 partition</b> | <b>Best model</b>                                                          | K80+I             |             | TrN+I                                                              |             |             | HKY+I             |
|                                   | <b>Proportion invariant (I): starting value [lower limit, upper limit]</b> | 0.75 [0.55, 0.85] |             | 0.5 [0.15,0.85]                                                    |             |             | 0.44 [0.34, 0.54] |
|                                   | <b>Nucleotide evolution model</b>                                          | HKY               |             | TN93                                                               |             |             | HKY               |
|                                   | <b>Base frequency setting</b>                                              | equal             |             | estimated<br>kappa1: 2.1<br>[0.5, 4];<br>kappa2: 11.5<br>[0.5, 23] |             |             | estimated         |
|                                   | <b>Kappa setting: starting value [lower limit, upper limit]</b>            | 23 [5,40]         |             |                                                                    |             |             | 4 [2, 6]          |
| <b>Codon position 2 partition</b> | <b>Best model</b>                                                          | HKY+I             |             | K80+I                                                              |             |             | SYM+G             |
|                                   | <b>Proportion invariant (I): starting value [lower limit, upper limit]</b> | 0.8 [0.6, 0.9]    |             | 0.71 [0.3, 0.9]                                                    |             |             | 0                 |

|                                                                            |            |  |           |                                                                                                 |
|----------------------------------------------------------------------------|------------|--|-----------|-------------------------------------------------------------------------------------------------|
| <b>Gamma (G) category shape: starting value [lower limit, upper limit]</b> |            |  |           | 0.25 [0.15-0.4]                                                                                 |
| <b>Nucleotide evolution model</b>                                          | HKY        |  | HKY       | GTR                                                                                             |
| <b>Base frequency setting</b>                                              | estimated  |  | equal     | equal                                                                                           |
| <b>Kappa setting: starting value [lower limit, upper limit]</b>            | 10 [2, 20] |  | 6 [1, 13] |                                                                                                 |
| <b>Mutation rate settings: starting value [lower limit, upper limit]</b>   |            |  |           | AC: 1 [0.5,2]; AG 1 [0.4,1.8]; AT 0.03 [0.001, 0.15]; CG 0.05 [0.001-0.2]; GT 0.03 [0.001, 0.1] |

**Codon position 1+2 partition**

|                                                                            |                   |                   |                   |
|----------------------------------------------------------------------------|-------------------|-------------------|-------------------|
| <b>Best model</b>                                                          | K80+I             | HKY+I             | TrN+G             |
| <b>Proportion invariant (I): starting value [lower limit, upper limit]</b> | 0.76 [0.66, 0.86] | 0.76 [0.66, 0.86] | 0                 |
| <b>Gamma (G) category shape: starting value [lower limit, upper limit]</b> |                   |                   | 0.34 [0.14, 0.64] |
| <b>Nucleotide evolution model</b>                                          | HKY               | HKY               | TN93              |
| <b>Base frequency setting</b>                                              | equal             | estimated         | estimated         |

|                                       |                                                                                        |                                                                                                                                           |                                                                                                                                    |                      |                      |             |                                                        |
|---------------------------------------|----------------------------------------------------------------------------------------|-------------------------------------------------------------------------------------------------------------------------------------------|------------------------------------------------------------------------------------------------------------------------------------|----------------------|----------------------|-------------|--------------------------------------------------------|
|                                       | <b>Kappa setting:<br/>starting value [lower<br/>limit, upper limit]</b>                |                                                                                                                                           | 10 [5, 15]                                                                                                                         |                      | 20 [8, 36]           |             | kappa1: 11.5<br>[5.5, 19.5];<br>kappa2: 23 [10,<br>36] |
| <b>Codon position 3<br/>partition</b> | <b>Best model</b>                                                                      | GTR+G                                                                                                                                     | GTR                                                                                                                                | HKY+I                | HKY+I                | HKY         | TrN                                                    |
|                                       | <b>Proportion invariant<br/>(I): starting value<br/>[lower limit, upper<br/>limit]</b> | 0                                                                                                                                         | 0                                                                                                                                  | 0.17 [0.07,<br>0.27] | 0.18 [0.08,<br>0.28] | 0           | 0                                                      |
|                                       | <b>Gamma (G) category<br/>shape: starting value<br/>[lower limit, upper<br/>limit]</b> | 1.5 [0.5, 2.5]                                                                                                                            |                                                                                                                                    |                      |                      |             |                                                        |
|                                       | <b>Nucleotide evolution<br/>model</b>                                                  | GTR                                                                                                                                       | GTR                                                                                                                                | HKY                  | HKY                  | HKY         | TN93                                                   |
|                                       | <b>Base frequency<br/>setting</b>                                                      | estimated                                                                                                                                 | estimated                                                                                                                          | estimated            | estimated            | estimated   | estimated                                              |
|                                       | <b>Kappa setting:<br/>starting value [lower<br/>limit, upper limit]</b>                |                                                                                                                                           |                                                                                                                                    | 17 [11, 23]          | 28 [18, 44]          | 23 [13, 36] | kappa1: 17 [7,<br>27]; kappa2: 6.5<br>[2.5, 10.5]      |
|                                       | <b>Mutation rate<br/>settings: starting<br/>value [lower limit,<br/>upper limit]</b>   | AC: 0.4 [0.24,<br>0.56]; AG 0.78<br>[0.48, 1.08]; AT:<br>0.02 [0.001,<br>0.04]; CG: 0.026<br>[0.001, 0.08]; GT<br>0.033 [0.001,<br>0.066] | AC 0.17 [0.07,<br>0.27]; AG: 1<br>[0.6, 1.4]; AT:<br>0.01 [0.001,<br>0.03]; CG: 0.27<br>[0.1, 0.45]; GT:<br>0.04 [0.001,<br>0.075] |                      |                      |             |                                                        |
